# Supplementary material
Source: MDPI journal article supplement (https://www.mdpi.com/1999-4893/11/12/212)
Supplement: s1 [file s1]

# 1 Optimizing RCBD with independent treatments

## 1.1 Specify required input

```
rm(list = ls(all=TRUE)[!grepl("global.var.A", ls(all=TRUE))])
h2=0.6; rhox=0.6; rhoy=0.6; DesN=100; criteria="A"; s20=0
pedigree = "Indep"
blocks=6;rb=5;cb=6;Tr=15;Tc=12;Treatments=1:30
source("final.R")
```

## 1.2 Generate m=100 initial designs

```
res1 = MultipleDesigns(DesN,blocks,Treatments,
  rb,cb,Tr,Tc,Amat=FALSE,criteria,h2,rhox,
  rhoy,s20,irregular=FALSE)
```

```
names(res1)
```

```
## [1] "newmatdf" "trace0" "min_value" "meanA"
```

## 1.3 Calculate the variance-covariance matrix

```
res2 <- VarCov.rcbd(matdf=res1$newmatdf,rhox,
  rhoy,h2,s20,Tr,Tc,criteria="A",Amat=FALSE,irregular=FALSE)
Rinv = as.matrix(res2$Rinv)
Ginv = as.matrix(res2$Ginv)
K = as.matrix(res2$K)
names(res2)
```

```
## [1] "traceI" "Ginv" "Rinv" "K"
```

## 1.4 Apply the simple pairwise algorithm (SP)

```
start <- Sys.time()
ans = Optimize.rcbd(matdf=res1$newmatdf,n=5000,
  traceI=res2$traceI,criteria="A",Rinv,Ginv,K)
tim <- Sys.time() - start
```

```
tim
```

```
## Time difference of 1.05481 mins
```

```
names(ans)
```

```
## [1] "TRACE" "mat" "Design_best"
```

## 1.5 SP: Calculate design efficiency based on A-optimality

```
Aopt <- ans$mat[nrow(ans$mat),'value']
init0 <- ans$mat[1,'value']
(ODE = abs((init0 - Aopt)/init0)*100)
```

```
##      value
## 3.741123
```

```
head(ans$Design_best)
```

```
##   Row Col Reps Treatments
## 1   1   1    1          16
## 2   1   2    1          21
## 3   1   3    1           7
## 4   1   4    1          28
## 5   1   5    1          17
## 6   1   6    1           1
```

## 1.6 Plot the initial and final designs

```
plotdesign(res1$newmatdf,rb,cb,Tr,Tc,text.size=5,
          axistextsize=12,
          titlesize=15,axislabsize=12,
          maintitle="Initial Design")
plotdesign(ans$Design_best,rb,cb,Tr,Tc,text.size=5,
          axistextsize=12,
          titlesize=15,axislabsize=12,
          maintitle="Final Design")
```

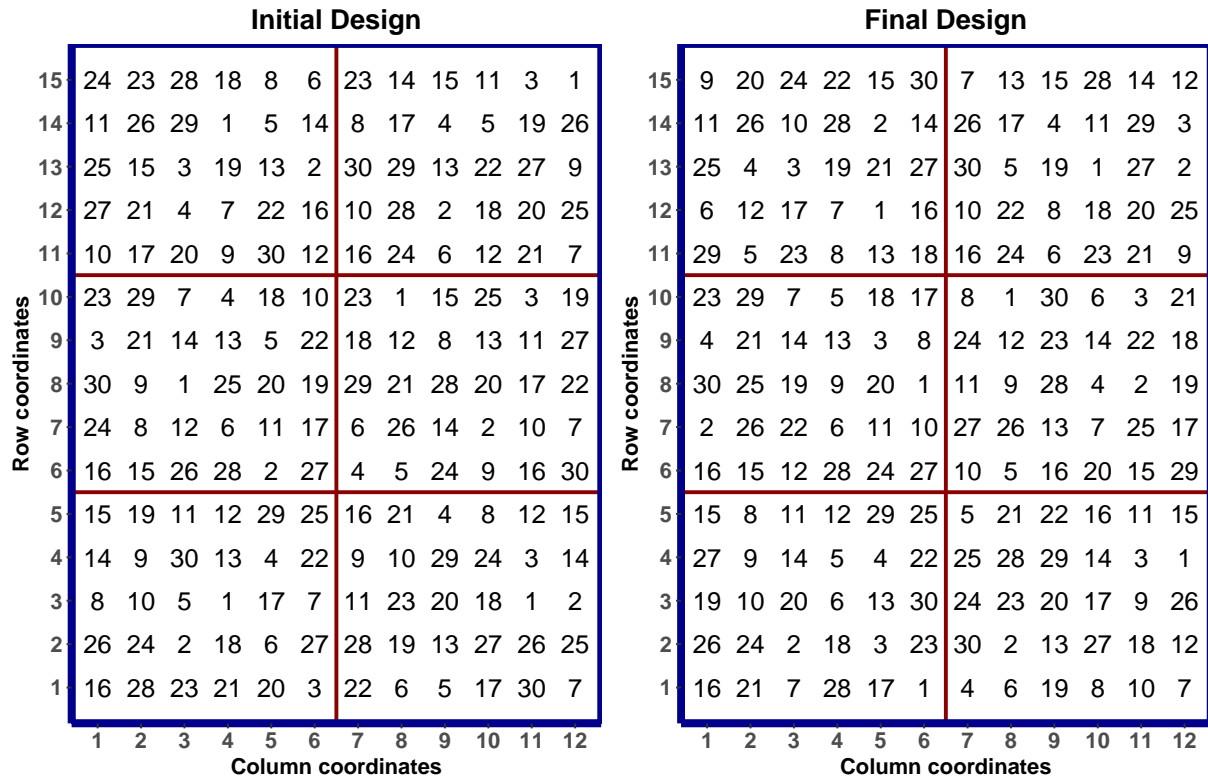

Figure 1: Initial and final designs using SP algorithm for genetically unrelated treatments.

```
library(desplot)
desplot(Reps~Col+Row, ans$Design_best, text=Treatments,
        cex=1, show.key=FALSE, main=NULL)
```

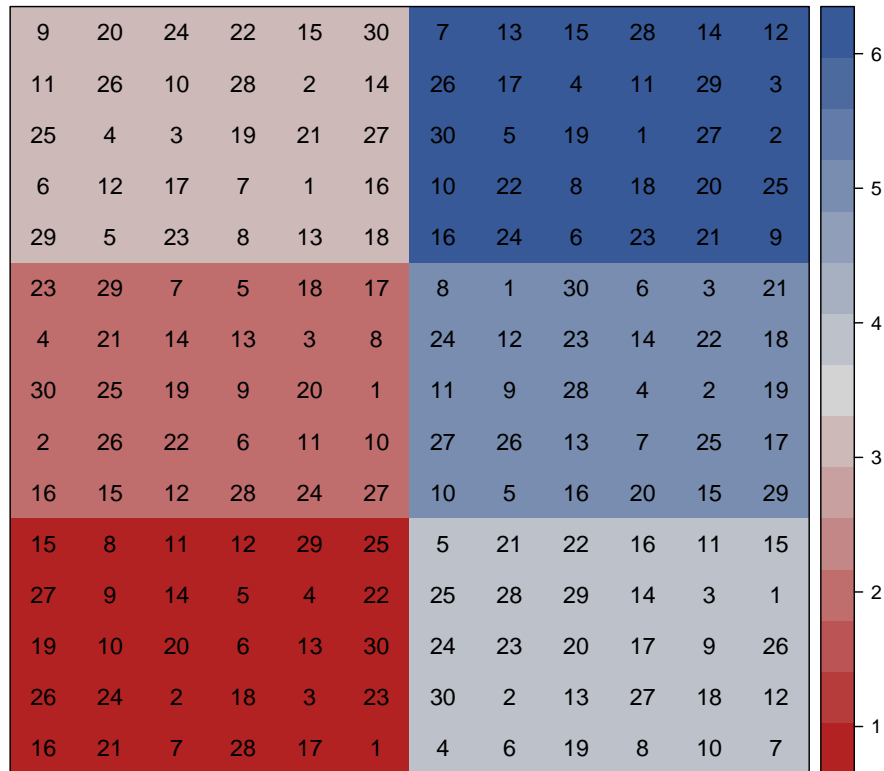

Figure 2: Final Design (using desplot package).

## 1.7 Apply the simulated annealing algorithm (SA)

```
rm(ans)
rm(tim)
start <- Sys.time()
ans = Optimize_SimAnn_rcbd(matdf=res1$newmatdf,n=5000,
  traceI=res2$traceI,criteria="A",Rinv,Ginv,K)
tim <- Sys.time() - start
```

```
tim
```

```
## Time difference of 1.056938 mins
```

## 1.8 SA: Calculate design efficiency based on A-optimality

```
Aopt <- ans$mat[nrow(ans$mat),'value']
init0 <- ans$mat[1,'value']
(ODE = abs((init0 - Aopt)/init0)*100)
```

```
## value
## 3.533626
```

## 1.9 Apply the greedy pairwise swap algorithm (GP4)

```
rm(ans)
rm(tim)
start <- Sys.time()
ans = OptimizeGreedy.rcbd(matdf=res1$newmatdf,
  n=5000,traceI=res2$traceI,
  criteria="A",gsize=4,Rinv,Ginv,K)
tim <- Sys.time() - start
```

```
tim
```

```
## Time difference of 1.059972 mins
```

## 1.10 GP4: Calculate design efficiency based on A-optimality

```
Aopt <- ans$mat[nrow(ans$mat),'value']
init0 <- ans$mat[1,'value']
(ODE = abs((init0 - Aopt)/init0)*100)
```

```
## value
## 2.991614
```

# 2 Optimizing RCBD with treatments from Half-sibs family

## 2.1 Specify required input

```
rm(list = ls(all=TRUE)[!grepl("global.var.A", ls(all=TRUE))])
h2=0.6; rhox=0.6; rhoy=0.6;DesN=100; criteria="A"; s20=0
pedigree = "Half-sib"
blocks=6;rb=5;cb=6;Tr=15;Tc=12;Treatments=1:30
source("final.R")
```

## 2.2 Read pedigree file and calculate the numerator relationship matrix

```
ped30hs <- read.csv("ped30hs.csv",header=TRUE,as.is = TRUE)
Amat <- GenA(male=ped30hs[, "sire"], female = ped30hs[, "dam"])
Amat <- as.matrix(Amat[-c(1:5), -c(1:5)])
```

## 2.3 Generate m=100 initial designs

```
res1 = MultipleDesigns(DesN,blocks,  
  Treatments,rb,cb,Tr,Tc,Amat,criteria,  
  h2,rhox,rhoy,s20,irregular=FALSE)
```

```
names(res1)
```

```
## [1] "newmatdf" "trace0" "min_value" "meanA"
```

## 2.4 Calculate the variance-covariance matrix

```
res2 <- VarCov.rcbd(matdf=res1$newmatdf,rhox,  
  rhoy,h2,s20,Tr,Tc,criteria="A",Amat,irregular=FALSE)  
Rinv = as.matrix(res2$Rinv)  
Ginv = as.matrix(res2$Ginv)  
K = as.matrix(res2$K)  
res2$traceI
```

```
## [1] 1.848873
```

```
names(res2)
```

```
## [1] "traceI" "Ginv" "Rinv" "K"
```

## 2.5 Apply the simple pairwise algorithm (SP)

```
start <- Sys.time()  
ans = Optimize.rcbd(matdf=res1$newmatdf,  
  n=5000,traceI=res2$traceI,criteria="A",Rinv,Ginv,K)  
tim <- Sys.time() - start
```

```
tim
```

```
## Time difference of 1.05918 mins
```

```
names(ans)
```

```
## [1] "TRACE" "mat" "Design_best"
```

## 2.6 SP: Calculate design efficiency based on A-optimality

```
Aopt <- ans$mat[nrow(ans$mat),'value']  
init0 <- ans$mat[1,'value']  
(ODE = abs((init0 - Aopt)/init0)*100)
```

```
##      value
## 2.690385
```

```
head(ans$Design_best)
```

```
##   Row Col Reps Treatments
## 1   1   1    1          1
## 2   1   2    1         29
## 3   1   3    1          8
## 4   1   4    1         27
## 5   1   5    1         22
## 6   1   6    1         21
```

## 2.7 Plot the initial and final designs

```
plotdesign(res1$newmatdf,rb,cb,Tr,Tc,text.size=5,
          axistextsize=12,
          titlesize=15,axislabsize=12,
          maintitle="Initial Design")
plotdesign(ans$Design_best,rb,cb,Tr,Tc,text.size=5,
          axistextsize=12,
          titlesize=15,axislabsize=12,
          maintitle="Final Design")
```

| Initial Design     |    |    |    |    |    |    |    |    |    |    |    |    |    | Final Design       |    |    |    |    |    |    |    |    |    |    |    |    |  |
|--------------------|----|----|----|----|----|----|----|----|----|----|----|----|----|--------------------|----|----|----|----|----|----|----|----|----|----|----|----|--|
| Row coordinates    | 15 | 2  | 30 | 9  | 21 | 19 | 3  | 12 | 29 | 11 | 13 | 18 | 24 | 15                 | 5  | 14 | 9  | 30 | 23 | 21 | 25 | 11 | 12 | 26 | 15 | 5  |  |
|                    | 14 | 7  | 15 | 22 | 13 | 23 | 24 | 21 | 27 | 23 | 7  | 6  | 5  | 14                 | 8  | 15 | 22 | 12 | 20 | 24 | 21 | 27 | 23 | 7  | 6  | 17 |  |
|                    | 13 | 25 | 29 | 11 | 1  | 8  | 4  | 8  | 16 | 2  | 4  | 3  | 26 | 13                 | 13 | 16 | 11 | 1  | 27 | 10 | 2  | 13 | 8  | 4  | 14 | 19 |  |
|                    | 12 | 18 | 20 | 17 | 16 | 14 | 5  | 14 | 17 | 10 | 30 | 1  | 9  | 12                 | 17 | 26 | 3  | 25 | 7  | 2  | 29 | 10 | 28 | 16 | 1  | 20 |  |
|                    | 11 | 12 | 10 | 28 | 27 | 6  | 26 | 25 | 20 | 15 | 28 | 22 | 19 | 11                 | 18 | 4  | 6  | 19 | 28 | 29 | 24 | 9  | 18 | 30 | 22 | 3  |  |
|                    | 10 | 10 | 3  | 4  | 2  | 13 | 11 | 18 | 8  | 24 | 2  | 26 | 21 | 10                 | 10 | 3  | 19 | 2  | 22 | 28 | 9  | 8  | 24 | 18 | 16 | 21 |  |
|                    | 9  | 22 | 24 | 7  | 5  | 28 | 27 | 9  | 20 | 3  | 11 | 7  | 15 | 9                  | 11 | 24 | 27 | 5  | 7  | 30 | 28 | 5  | 3  | 11 | 7  | 15 |  |
|                    | 8  | 20 | 15 | 26 | 16 | 14 | 9  | 23 | 25 | 1  | 19 | 5  | 10 | 8                  | 20 | 15 | 17 | 1  | 6  | 26 | 23 | 19 | 1  | 4  | 12 | 10 |  |
|                    | 7  | 1  | 12 | 8  | 21 | 6  | 18 | 16 | 29 | 22 | 27 | 17 | 28 | 7                  | 9  | 12 | 8  | 21 | 14 | 18 | 26 | 27 | 2  | 20 | 29 | 25 |  |
|                    | 6  | 17 | 19 | 25 | 30 | 29 | 23 | 6  | 30 | 14 | 13 | 4  | 12 | 6                  | 4  | 16 | 25 | 13 | 29 | 23 | 6  | 30 | 14 | 17 | 22 | 13 |  |
|                    | 5  | 16 | 27 | 10 | 29 | 13 | 4  | 28 | 4  | 20 | 23 | 14 | 26 | 5                  | 16 | 3  | 14 | 23 | 13 | 4  | 10 | 6  | 13 | 14 | 20 | 22 |  |
|                    | 4  | 23 | 6  | 8  | 25 | 30 | 24 | 25 | 5  | 15 | 9  | 21 | 7  | 4                  | 24 | 30 | 20 | 25 | 26 | 10 | 30 | 5  | 15 | 9  | 21 | 26 |  |
|                    | 3  | 26 | 2  | 28 | 15 | 11 | 14 | 1  | 18 | 19 | 16 | 6  | 12 | 3                  | 6  | 2  | 18 | 15 | 11 | 5  | 1  | 18 | 19 | 16 | 17 | 24 |  |
|                    | 2  | 5  | 17 | 3  | 9  | 20 | 12 | 2  | 27 | 24 | 29 | 3  | 17 | 2                  | 28 | 17 | 7  | 9  | 19 | 12 | 27 | 25 | 4  | 29 | 11 | 23 |  |
|                    | 1  | 22 | 18 | 1  | 19 | 7  | 21 | 10 | 30 | 13 | 22 | 8  | 11 | 1                  | 1  | 29 | 8  | 27 | 22 | 21 | 12 | 28 | 2  | 7  | 8  | 3  |  |
| Column coordinates |    |    |    |    |    |    |    |    |    |    |    |    |    | Column coordinates |    |    |    |    |    |    |    |    |    |    |    |    |  |

**Figure 3:** Initial and final designs for half-sib treatments using simple pairwise algorithm.

```
library(desplot)
desplot(Reps~Col+Row, ans$Design_best, text=Treatments,
        cex=1, show.key=FALSE, main=NULL)
```

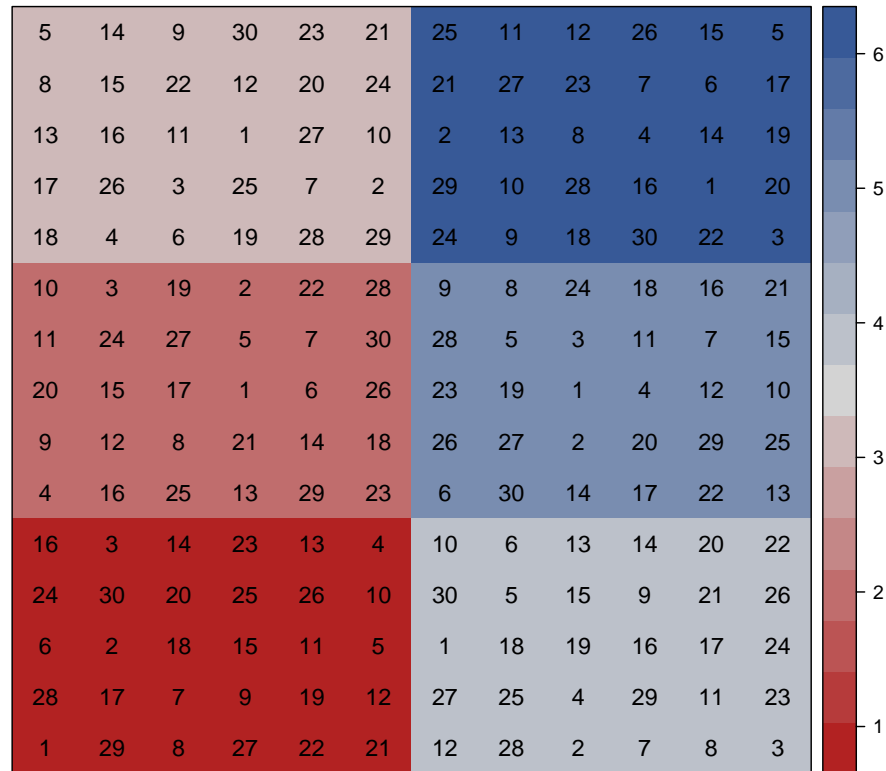

Figure 4: Final Design (using desplot package) for half-sibs family.

## 2.8 Apply the simulated annealing algorithm (SA)

```
rm(ans)
rm(tim)
start <- Sys.time()
ans = Optimize_SimAnn_rcbd(matdf=res1$newmatdf,
  n=5000,traceI=res2$traceI,criteria="A",Rinv,Ginv,K)
tim <- Sys.time() - start
```

```
tim
```

```
## Time difference of 1.060767 mins
```

```
names(ans)
```

```
## [1] "TRACE"      "mat"        "Design_best"
```

## 2.9 SA: Calculate design efficiency based on A-optimality

```
Aopt <- ans$mat[nrow(ans$mat),'value']
init0 <- ans$mat[1,'value']
(ODE = abs((init0 - Aopt)/init0)*100)
```

```
##      value
## 2.422064
```

## 2.10 Apply the genetic neighborhood algorithm (GN)

```
rm(ans)
rm(tim)
start <- Sys.time()
ans = Optimize_GNN_rcbd(matdf=res1$newmatdf,
  n=5000,traceI=res2$traceI,criteria="A",
  Amat,Rinv,Ginv,K)
tim <- Sys.time() - start
```

```
tim
```

```
## Time difference of 1.134075 mins
```

## 2.11 GN: Calculate design efficiency based on A-optimality

```
Aopt <- ans$mat[nrow(ans$mat),'value']
init0 <- ans$mat[1,'value']
(ODE = abs((init0 - Aopt)/init0)*100)
```

```
##      value
## 0.3834114
```

## 2.12 Apply the greedy pairwise swap algorithm (GP4)

```
rm(ans)
rm(tim)
start <- Sys.time()
ans = OptimizeGreedy_rcbd(matdf=res1$newmatdf,
  n=5000,traceI=res2$traceI,criteria="A",
  gsize=4,Rinv,Ginv,K)
tim <- Sys.time() - start
```

```
tim
```

```
## Time difference of 1.061638 mins
```

## 2.13 GP4: Calculate design efficiency based on A-optimality

```
Aopt <- ans$mat[nrow(ans$mat),'value']
init0 <- ans$mat[1,'value']
```

```
(ODE = abs((init0 - Aopt)/init0)*100)
```

```
##      value
## 2.170021
```

### 3 Optimizing RCBD with treatments from Full-sibs family

#### 3.1 Specify required input

```
rm(list = ls(all=TRUE)[!grepl("global.var.A", ls(all=TRUE))])
h2=0.6; rhox=0.6; rhoy=0.6; DesN=100; criteria="A"; s20=0
pedigree = "Full-sib"
blocks=6;rb=5;cb=6;Tr=15;Tc=12;Treatments=1:30
source("final.R")
```

#### 3.2 Read pedigree file and calculate the numerator relationship matrix

```
ped30fs <- read.csv("ped30fs.csv",header=TRUE,as.is = TRUE)
Amat <- GenA(male=ped30fs[, "sire"], female = ped30fs[, "dam"])
Amat <- as.matrix(Amat[-c(1:5), -c(1:5)])
```

#### 3.3 Generate m=100 initial designs

```
res1 = MultipleDesigns(DesN,blocks,Treatments,
  rb, cb, Tr, Tc, Amat, criteria, h2,
  rhox, rhoy, s20, irregular=FALSE)
```

```
names(res1)
```

```
## [1] "newmatdf" "trace0" "min_value" "meanA"
```

#### 3.4 Calculate the variance-covariance matrix

```
res2 <- VarCov.rcbd(matdf=res1$newmatdf,rhox,
rhoy,h2,s20,Tr,Tc,criteria="A",Amat,irregular=FALSE)
Rinv = as.matrix(res2$Rinv)
Ginv = as.matrix(res2$Ginv)
K = as.matrix(res2$K)
names(res2)
```

```
## [1] "traceI" "Ginv" "Rinv" "K"
```

```
res2$traceI
```

```
## [1] 4.38817
```

### 3.5 Apply the simple pairwise algorithm (SP)

```
start <- Sys.time()
ans = Optimize.rcbd(matdf=res1$newmatdf,n=5000,
  traceI=res2$traceI, criteria="A",Rinv,Ginv,K)
tim <- Sys.time() - start
```

```
tim
```

```
## Time difference of 1.064047 mins
```

```
names(ans)
```

```
## [1] "TRACE"      "mat"      "Design_best"
```

### 3.6 SP: Calculate design efficiency based on *A*-optimality

```
Aopt <- ans$mat[nrow(ans$mat),'value']
init0 <- ans$mat[1,'value']
(ODE = abs((init0 - Aopt)/init0)*100)
```

```
##      value
```

```
## 0.9719083
```

```
head(ans$Design_best)
```

```
##   Row Col Reps Treatments
## 1   1   1    1          5
## 2   1   2    1          9
## 3   1   3    1         24
## 4   1   4    1          3
## 5   1   5    1         15
## 6   1   6    1         30
```

### 3.7 Plot the initial and final designs

```
plotdesign(res1$newmatdf,rb,cb,Tr,Tc,text.size=5,
  axistextsize=12,
  titlesize=15,axislabsz=12,
  maintitle="Initial Design")
plotdesign(ans$Design_best,rb,cb,Tr,Tc,text.size=5,
  axistextsize=12,
```

```

titlesize=15,axislabsize=12,
maintitle="Final Design")

```

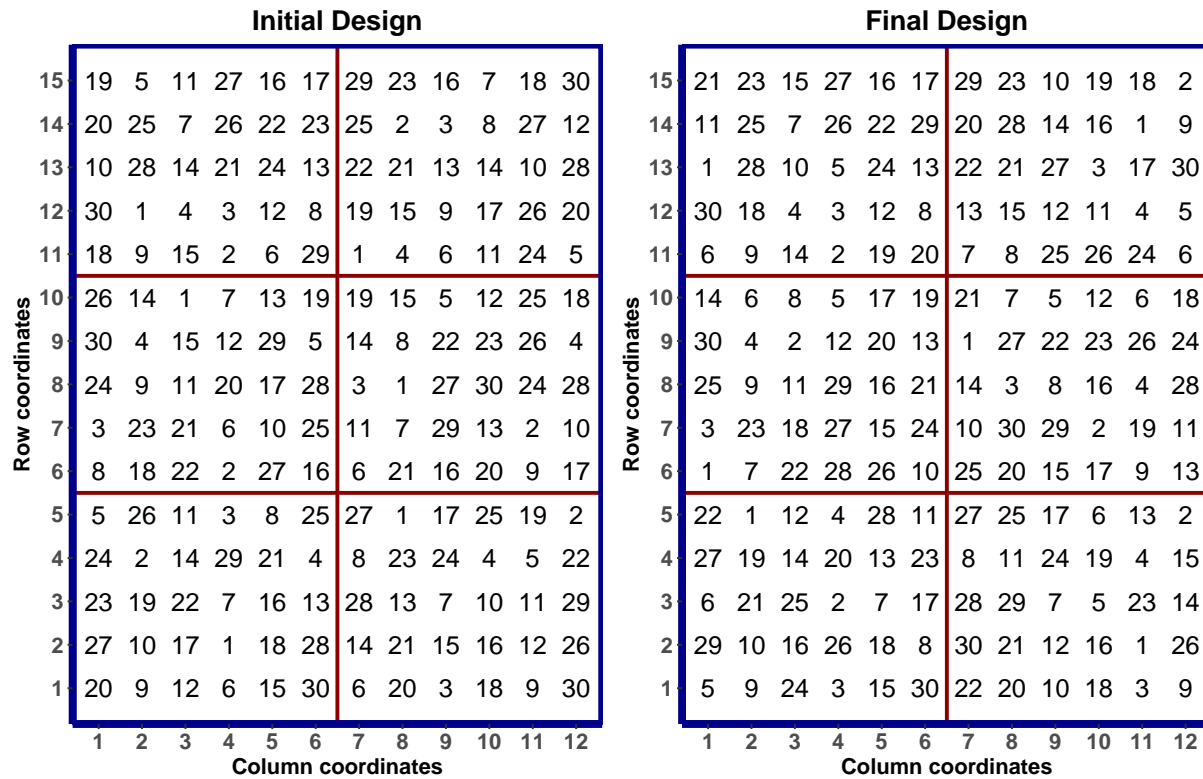

Figure 5: Initial and final designs for full-sib treatments using simple pairwise algorithm.

### 3.8 Apply the simulated annealing algorithm (SA)

```

rm(ans)
rm(tim)
start <- Sys.time()
ans = Optimize_SimAnn_rcbd(matdf=res1$newmatdf,
  n=5000,traceI=res2$traceI,
  criteria="A",Rinv,Ginv,K)
tim <- Sys.time() - start

```

```
tim
```

```
## Time difference of 1.055937 mins
```

### 3.9 SA: Calculate design efficiency based on A-optimality

```

Aopt <- ans$mat[nrow(ans$mat),'value']
init0 <- ans$mat[1,'value']

```

```
(ODE = abs((init0 - Aopt)/init0)*100)
```

```
##      value
## 1.061229
```

```
head(ans$Design_best)
```

```
##   Row Col Repts Treatments
## 1   1   1     1         2
## 2   1   2     1         5
## 3   1   3     1        19
## 4   1   4     1        29
## 5   1   5     1        25
## 6   1   6     1        24
```

### 3.10 Apply the genetic neighborhood algorithm (GN)

```
rm(ans)
rm(tim)
start <- Sys.time()
ans = Optimize_GNN_rcbd(matdf=res1$newmatdf,
  n=5000,traceI=res2$traceI,criteria="A",
  Amat,Rinv,Ginv,K)
tim <- Sys.time() - start
```

```
tim
```

```
## Time difference of 1.292614 mins
```

### 3.11 GN: Calculate design efficiency based on A-optimality

```
Aopt <- ans$mat[nrow(ans$mat),'value']
init0 <- ans$mat[1,'value']
(ODE = abs((init0 - Aopt)/init0)*100)
```

```
##      value
## 0.1465577
```

```
head(ans$Design_best)
```

```
##   Row Col Repts Treatments
## 1   1   1     1         20
## 2   1   2     1         9
## 3   1   3     1        12
## 4   1   4     1         6
## 5   1   5     1        15
```

```
## 6    1    6    1          30
```

### 3.12 Apply the greedy pairwise algorithm (GP4)

```
rm(ans)
rm(tim)
start <- Sys.time()
ans = OptimizeGreedy.rcbd(matdf=res1$newmatdf,
  n=5000,traceI=res2$traceI,criteria="A",
  gsize=4,Rinv,Ginv,K)
tim <- Sys.time() - start
```

```
tim
```

```
## Time difference of 1.061718 mins
```

### 3.13 GP4: Calculate design efficiency based on A-optimality

```
Aopt <- ans$mat[nrow(ans$mat),'value']
init0 <- ans$mat[1,'value']
(ODE = abs((init0 - Aopt)/init0)*100)
```

```
##      value
## 0.8103016
```

```
head(ans$Design_best)
```

```
##   Row Col Reps Treatments
## 1   1   1    1          4
## 2   1   2    1          29
## 3   1   3    1          25
## 4   1   4    1          22
## 5   1   5    1           3
## 6   1   6    1          10
```
